# Supplementary material
Source: Elsevier journal article supplement (https://www.sciencedirect.com/science/article/pii/S0121812321000785)
Supplement: mmc1 [file S0121812321000785:mmc1.pdf]

Artículo de Revisión

## **El síndrome antifosfolípido**

### **The antiphospholipid syndrome**

Giuseppe Barilaro, Gerard Espinosa, Ricard Cervera

Servicio de Enfermedades Autoinmunes, Hospital Clínic, Barcelona, España

#### **Resumen**

El SAF es una condición de hipercoagulabilidad caracterizada por el desarrollo de trombosis y morbilidad obstétrica (abortos recurrentes, muertes fetales antes de la semana 10 de gestación y/o partos prematuros) en pacientes con anticuerpos antifosfolípidos, específicamente el anticoagulante lúpico, los anticuerpos anticardiolipina y anti- $\beta$ 2-glicoproteína-1. En la mayoría de los casos se presenta de forma aislada, pero puede asociarse a otras enfermedades autoinmunes como el lupus eritematoso sistémico. Además, los anticuerpos antifosfolípidos se pueden encontrar en individuos sin la enfermedad. El tratamiento de la trombosis se basa en anticoagulación indefinida, mientras que aspirina a dosis bajas y heparina de bajo peso molecular representan la base del tratamiento de la morbilidad obstétrica. El síndrome de anticuerpos antifosfolípidos catastrófico se trata con una combinación de anticoagulación, corticoides y recambios plasmáticos. La estandarización de los ensayos serológicos, la inclusión de otros anticuerpos y otras manifestaciones en los criterios clasificatorios, el tratamiento de las manifestaciones no criterio y de los casos refractarios representan las áreas de incertidumbre del síndrome.

**Keywords:** Antiphospholipid syndrome; Anticardiolipin Beta2-glicoprotein I; Lupus anticoagulant; Oral anticoagulation; Heparin

**Palabras clave:** Síndrome de anticuerpos antifosfolípidos; Anticardiolipina Beta2-glicoproteína 1; Anticoagulante lúpico; Anticoagulación oral; Heparina

## Introducción

Cuando August Von Wasserman desarrolló su prueba para el diagnóstico de la sífilis,<sup>1</sup> basada en un autoanticuerpo (llamado “reagina”) dirigido contra un antígeno del tejido lipoide, que posteriormente fue purificado y denominado cardiolipina por Mary C Pangborn,<sup>2</sup> él nunca pudo imaginar que estaba colocando la primera piedra para el descubrimiento de un síndrome que sería descrito, eventualmente, por Graham Hughes, casi 80 años más tarde.<sup>3</sup> Desde su primera descripción, los avances en el reconocimiento de los aspectos tanto clínicos como fisiopatológicos de la enfermedad han sido notables, y aunque el síndrome antifosfolipídico (SAF) fue descrito originalmente como una trombofilia autoinmune adquirida, sabemos que otros mecanismos están involucrados en varias manifestaciones de la enfermedad.

El SAF es una condición de hipercoagulabilidad que se caracteriza por el desarrollo de trombosis arterial, venosa y/o microvascular, y morbilidad del embarazo (abortos espontáneos recurrentes, muertes fetales después de la décima semana de gestación y/o partos prematuros) que se presenta en los pacientes con anticuerpos antifosfolipídicos (aFL) persistentes, es decir, anticoagulante lúpico (AL), anticuerpos anticardiolipina (aCL) IgG o IgM, o anticuerpos anti- $\beta$ 2-glicoproteína-I (a $\beta$ 2GPI) IgG o IgM. El SAF se puede presentar como una afección aislada (SAF primario), o en el contexto de una enfermedad autoinmune subyacente, más comúnmente el lupus eritematoso sistémico (LES). Con menos frecuencia, puede asociarse con otras enfermedades autoinmunes, infecciones, medicamentos y neoplasias malignas.

La descripción original del síndrome fue hecha por Graham Hughes en 1983,<sup>3</sup> si bien los primeros reportes de trombosis en pacientes con LES y AL se remontan a finales de la década de 1950 y comienzos de la década de 1960.<sup>4-6</sup> El compromiso de un solo vaso o las oclusiones vasculares múltiples pueden dar lugar a una amplia variedad de presentaciones en el SAF. Cualquier combinación de eventos vasculares oclusivos puede ocurrir en el mismo individuo y el intervalo de tiempo entre estos eventos también varía considerablemente de semanas a meses o incluso años. El proyecto “*Euro-Phospholipid*”, un estudio de 1000 pacientes europeos con SAF,<sup>7</sup> ha proporcionado información precisa sobre la prevalencia de la mayoría de las manifestaciones clínicas de este síndrome, que ahora es reconocido como una causa

importante de trombosis venosa profunda (TVP) con o sin embolia pulmonar, nuevos accidentes cerebrovasculares en individuos menores de 50 años y pérdida fetal recurrente. Las principales manifestaciones no trombóticas incluyen: livedo reticularis, enfermedad valvular cardíaca, nefropatía asociada con el SAF, corea, epilepsia, pérdida de memoria, migraña y mielopatía. También son muy frecuentes las alteraciones hematológicas, tales como la anemia hemolítica y la trombocitopenia. En un subgrupo de pacientes (alrededor del 1%), la trombosis puede afectar simultáneamente a múltiples órganos, configurando el llamado “síndrome antifosfolípido catastrófico” (SAFC).<sup>8</sup> Esta revisión hace énfasis en la epidemiología, la patogénesis y las manifestaciones clínicas más frecuentes así como en el manejo de esta enfermedad autoinmune.

## Epidemiología

Los aFL no son específicos para el SAF y se pueden encontrar en individuos sanos. Sin embargo, la prevalencia de positividad de aFL y SAF en la población general no ha sido analizada en forma exhaustiva y hasta el momento solo se han realizado dos estudios epidemiológicos basados en la población. En el primero, los autores estudiaron la epidemiología del SAF entre los años 2000 y 2015 en una cohorte inicial del Condado de Olmsted County, Minnesota, a través de un sistema de vinculación de registros. La incidencia anual del SAF en los adultos  $\geq 18$  años de edad fue de 2,1 (intervalo de confianza del 95% 1,4–2,8) por 100.000 habitantes. Las tasas de incidencia fueron similares en ambos sexos. La prevalencia estimada del SAF fue de 50 (IC 95% 42-58) por 100.000 habitantes y fue similar en ambos sexos.<sup>9</sup> En el segundo estudio, realizado en Corea entre los años 2007 y 2018, con datos extraídos de la *Health Insurance and Review Agency*, se encontró una incidencia de 0,75 por 100.000 personas-año (intervalo de confianza del 95% 0,73–0,78), mientras que la prevalencia fue del 6,19 por cada 100.000 habitantes.<sup>10</sup>

La prevalencia de la aparición de TVP en la población general se estima en 2–5%, el 10–20% está asociada con el SAF, lo cual sugiere que la prevalencia de trombosis venosa asociada con SAF puede llegar a ser del 0,3–1% de la población general.<sup>11</sup> Además, la prevalencia de aFL se ha estimado aproximadamente en un 11% entre los pacientes con infarto de miocardio y en un 17% entre los pacientes menores de 50 años con accidente cerebrovascular.<sup>12</sup> Los anticuerpos aFL están presentes en el

30-40% de los pacientes con LES y hasta un tercio de estos pacientes (10-15% de los pacientes con LES) tienen manifestaciones clínicas de SAF, especialmente trombosis venosas o arteriales.<sup>13,14</sup> Por el contrario, solo unos pocos pacientes con SAF primario tienden a evolucionar a LES avanzado y, por lo general, esto ocurre solo después de un largo período de tiempo.<sup>15</sup> Entre las mujeres con complicaciones del embarazo, la prevalencia de aFL es de alrededor del 6% y ahora se considera que los aFL son el factor de riesgo adquirido más frecuente para una causa tratable de pérdida recurrente del embarazo y para las complicaciones del embarazo (preeclampsia temprana y severa).<sup>12,13</sup> Se ha estimado que la prevalencia del SAF es inferior al 1% de todos los pacientes con SAF.<sup>16</sup>

### Patogénesis

Los aFL son anticuerpos heterogéneos y más de un mecanismo puede estar involucrado en el origen de la trombosis. Como se demostró en varios estudios, el principal blanco de los aFL es la  $\beta$ 2-glicoproteína I ( $\beta$ 2GPI), una proteína plasmática que se une ávidamente a los fosfolípidos de las superficies, cuya unión con la  $\alpha\beta$ 2GPI da lugar al cambio conformacional y dimerización de la misma (la forma inmunogénica de la  $\beta$ 2GPI).<sup>17-21</sup> La unión de los aFL a la  $\beta$ 2GPI en las superficies de las plaquetas, las células endoteliales y los monocitos regula positivamente la expresión de moléculas de adhesión celular protrombóticas tales como la E-selectina, ICAM-1, VCAM-1,<sup>22</sup> y del factor tisular<sup>23</sup> suprimiendo la actividad del inhibidor de la vía del factor tisular,<sup>24</sup> reduciendo la actividad de la proteína C activada,<sup>25</sup> y activando el complemento.<sup>26</sup> La anexina A2,<sup>27</sup> un receptor del activador del plasminógeno tisular, el receptor de tipo toll-4 (*toll like receptor-4*)<sup>28,29</sup> y el receptor de apoE2<sup>30</sup> pueden servir de intermediarios. Una posible explicación para la trombosis microvascular en el SAF es la regulación positiva del blanco mecanístico del complejo de rapamicina (mTOR) inducida por los aFL en las células endoteliales.<sup>31</sup>

La morbilidad en el embarazo se relacionó inicialmente con la disminución del intercambio sanguíneo materno-fetal como resultado de la formación de trombos en la vasculatura uteroplacentaria, una hipótesis respaldada por hallazgos de trombosis placentaria en pacientes con SAF obstétrico.<sup>32</sup> Sin embargo, dicho hallazgo histológico no es específico para el SAF, ya que también está presente en otras

afecciones, y la evidencia histológica de trombosis en la circulación uteroplacentaria no se puede demostrar en muchas placentas de pacientes con SAF. Por lo tanto, se han propuesto otras teorías para explicar la morbilidad del embarazo relacionada con el SAF, tales como la invasión trofoblástica defectuosa<sup>33</sup> y la transformación decidual al comienzo del embarazo o un daño placentario como resultado de eventos inflamatorios locales, en particular de la activación del complemento y el reclutamiento de neutrófilos.<sup>32,34</sup> La función del complemento parece ser particularmente interesante en tal contexto y un estudio prospectivo observacional multicéntrico titulado Predictores del Desenlace del Embarazo: Biomarcadores en el Síndrome de Anticuerpos Antifosfolípidos y LES - NCT00198068 (PROMISSE, por sus siglas en inglés, *Predictors of Pregnancy Outcome: Biomarkers in Antiphospholipid Antibody Syndrome and SLE* – NCT00198068) para examinar el papel del complemento como un posible marcador subrogado que predice desenlaces desfavorables del embarazo en las pacientes con SAF está en marcha y su finalización está programada para el 2021. La Figura 1 proporciona un breve resumen de los mecanismos fisiopatológicos que dan lugar a trombosis y morbilidad del embarazo en el SAF.

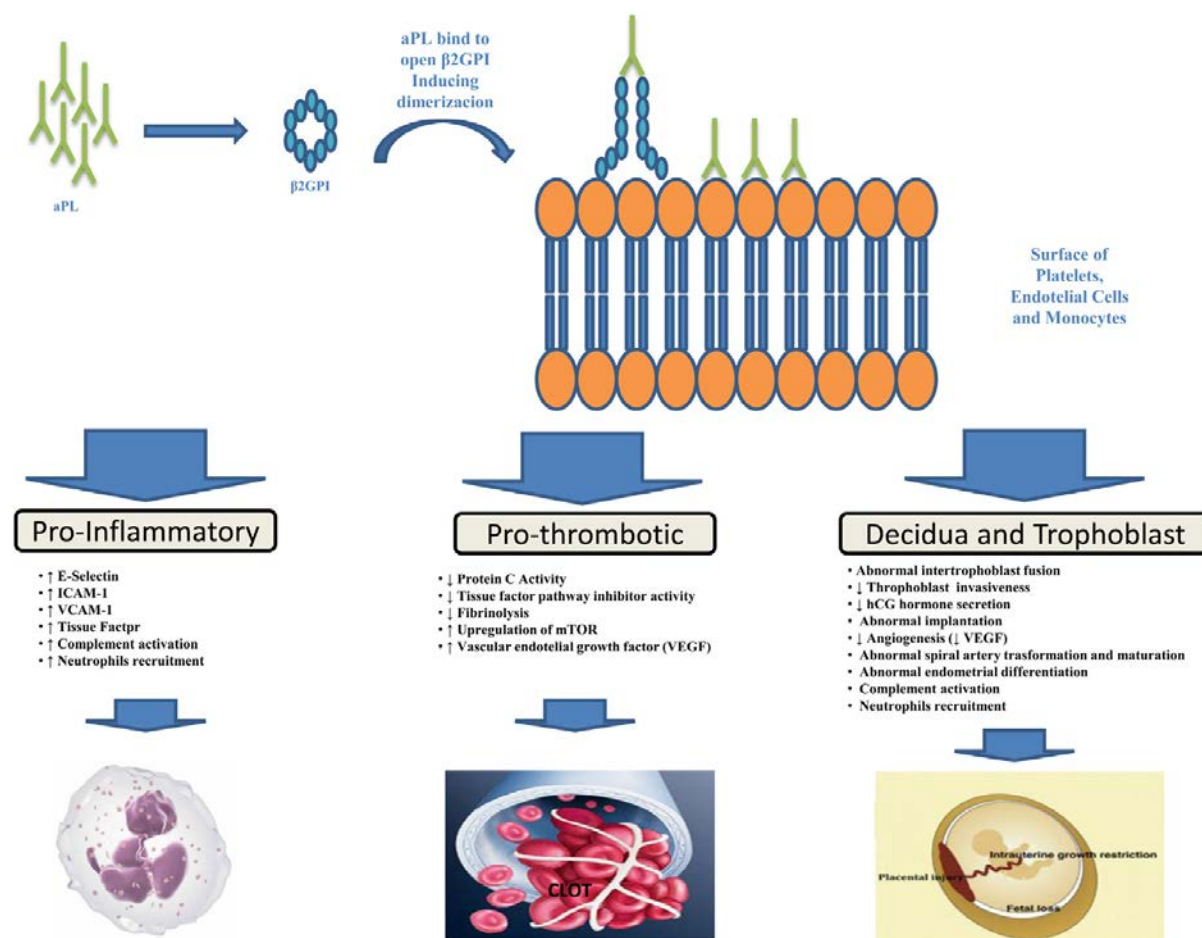

Fig. 1- Los anticuerpos antifosfolípidicos (aFL) producidos por las células B se unen a la  $\beta$ 2-glicoproteína I ( $\beta$ 2GPI) abierta e inmunogénica, dando lugar a un cambio conformacional y a la dimerización. La anexina A2, el receptor tipo Toll-4 y el receptor apoE-2 pueden servir como receptores para la  $\beta$ 2GPI en las superficies celulares. Esta unión da lugar a la activación de las células endoteliales, monocitos, plaquetas y neutrófilos y a una modificación del trofoblasto y la decidua, causando inflamación, trombosis y complicaciones del embarazo. gr1

### **Manifestaciones clínicas y diagnóstico del SAF**

Según los criterios de clasificación del SAF actuales, establecidos en el año 2006 durante el XI Congreso Internacional de Anticuerpos Antifosfolípidicos,<sup>35</sup> se puede hacer el diagnóstico en presencia de al menos una manifestación clínica (ya sea trombosis o morbilidad del embarazo) junto con la positividad (a títulos medios a altos) de uno o más aFL al menos en dos ocasiones con 12 semanas de diferencia (Tabla 1 Tabla 1). El aCL y el anti- $\beta$ 2GPI se detectan mediante inmunoensayos de fase sólida (por lo general ELISA),<sup>36</sup> mientras que la prueba del AL se hace siguiendo las recomendaciones del Subcomité Científico y de Estandarización de Anticuerpos Antifosfolípidos de la Sociedad Internacional de Trombosis y Hemostasia (SSC-ISTH, por sus siglas en inglés).<sup>37</sup> Por ejemplo, el AL se detecta a través de un procedimiento de tres pasos que implica la prolongación del tiempo de coagulación dependiente de fosfolípidos tal como el tiempo de veneno de víbora de Russell diluido (dRVVT) y el tiempo de tromboplastina parcial activado (TTPa) que no revierte al mezclar el plasma del paciente con plasma normal, pero revierte con la adición de un exceso de fosfolípidos. Uno de los principales inconvenientes de los ensayos de coagulación para el AL es que pueden alterarse con la terapia anticoagulante, dando resultados falsos positivos.<sup>37</sup> Además, los ensayos para anticuerpos aCL y a $\beta$ 2GPI muestran variaciones interensayo debidas a diferencias en la calibración y en las características del ensayo.<sup>38</sup>

**Tabla 1 – Adaptada de Miyakis S, Lockshin MD, Atsumi T, et al. *International consensus statement on an update of the classification criteria for definite antiphospholipid syndrome (APS)*. *J Thromb Haemost* 2006;4:295–306; con autorización.**

---

## Criterios de clasificación para el SAF (2006)

---

### *Criterios clínicos*

#### “ 1. Trombosis vascular

“ “ “ Uno o más episodios clínicos de trombosis arterial, venosa o de pequeños vasos, en cualquier tejido u órgano.

“ “ “ La trombosis debe estar sustentada por criterios objetivos validados (es decir, hallazgos inequívocos en estudios apropiados de imagenología o histopatología).

“ “ “ Para el soporte histopatológico, la trombosis debe estar presente sin una evidencia sustancial de inflamación de la pared del vaso.

#### “ 2. Morbilidad del embarazo (definida por uno de los siguientes criterios)

“ “ “ Una o más muertes inexplicables de un feto morfológicamente sano en la décima semana de gestación o después de esta, con morfología fetal saludable documentada por ultrasonido o por examen directo del feto.

“ “ “ Uno o más partos prematuros de un recién nacido morfológicamente sano antes de la semana 34 de gestación debido a: eclampsia o preeclampsia severa definida de acuerdo con las definiciones estándar o características reconocidas de insuficiencia placentaria

“ “ “ Tres o más abortos espontáneos consecutivos no explicables antes de la semana 10 de gestación, con exclusión de anomalías anatómicas u hormonales maternas y causas cromosómicas paternas y maternas.

“ “ “ “ En estudios de poblaciones de pacientes que tienen más de un tipo de morbilidad del embarazo, se recomienda encarecidamente a los investigadores que estratifiquen los grupos de pacientes de acuerdo con 1 de los 3 criterios

### *Criterios de laboratorio*

“ 1. Anticoagulante lúpico (AL) presente en el plasma, en 2 o más ocasiones con al menos 12 semanas de diferencia, detectado según las directrices de la Sociedad Internacional de Trombosis y Hemostasia (Subcomité Científico de AL/anticuerpos dependientes de fosfolípidos)

“ 2. Anticuerpos anticardiolipina (aCL) de isotipo IgG o IgM, o de ambos, en suero o plasma, presentes en títulos medios o altos (es decir, > 40 GPL o MPL, o superiores al percentil 99) en 2 o más ocasiones, con al menos 12 semanas de diferencia, medidos mediante un inmunoensayo ligado a enzimas (ELISA) estandarizado

“ 3. Anticuerpos anti- $\beta$ 2-glicoproteína-I (anti- $\beta$ 2GPI) de isotipo IgG o IgM, o de ambos, en suero o plasma (en títulos superiores al percentil 99), presentes en 2 o más ocasiones, con al menos 12 semanas de diferencia, medidas mediante ELISA estandarizado, según los procedimientos recomendados

---

Abreviaturas: GPL, unidades de fosfolípidos G; MPL, unidades de fosfolípidos M.

Como los aFL pueden estar presentes en individuos sanos y en la mayoría de las afecciones (tales como infecciones, neoplasias y otras enfermedades autoinmunes), se desaconseja enfáticamente una búsqueda generalizada de aFL en ausencia de alguna afección relevante para evitar que se presenten hallazgos incidentales. Se debe sospechar el SAF en el caso de un paciente joven que presenta trombosis no provocadas, especialmente si son en sitios inusuales y recurrentes, o en complicaciones trombóticas o del embarazo asociadas a otras enfermedades autoinmunes. El tromboembolismo venoso es la manifestación más frecuente en el SAF, con una frecuencia del 39% en la cohorte del *Europhospholipid Project*.<sup>7</sup> Los pacientes con tromboembolismo venoso presentan con mayor frecuencia TVP en los miembros inferiores, embolia pulmonar, o ambas. El accidente cerebrovascular y el ataque isquémico transitorio son los eventos arteriales más frecuentes. Combinados, la TVP (por lo general en las piernas) y el accidente cerebrovascular isquémico representan el 90% de todas las complicaciones.<sup>39</sup> Los siguientes hallazgos clínicos acompañantes pueden ser un indicio de que un paciente tiene el SAF: prolongación inexplicable del TTPa, livedo reticularis o racemosa, signos o síntomas de otra enfermedad autoinmune sistémica, y trombocitopenia leve. La trombocitopenia severa (recuento de plaquetas <20.000 por milímetro cúbico) es poco frecuente<sup>40</sup> y debe incentivar al médico para que considere otras causas. La recurrencia de la trombosis es un sello distintivo del SAF; interesantemente, los pacientes con trombosis arterial tienen un mayor riesgo de recurrencia en comparación con aquellos con trombosis venosa, y la norma es una tendencia a presentar recurrencias en el mismo lecho vascular (arterial).<sup>41</sup> Otros factores de riesgo de recurrencia son la triple positividad de aFL, positividad persistente del AL, y LES asociado.<sup>42</sup>

Los abortos espontáneos recurrentes antes de las 10 semanas de gestación son la manifestación obstétrica más frecuente del SAF.<sup>43</sup> Sin embargo, las complicaciones más típicas del embarazo por lo general se desarrollan después de 10 semanas de gestación y las pérdidas antes de las 10 semanas, especialmente si no son recurrentes, se pueden atribuir más comúnmente a defectos cromosómicos (que se deben excluir siempre para establecer un diagnóstico). Las manifestaciones obstétricas típicas son la pérdida tardía del embarazo, con preeclampsia temprana o severa, o con el síndrome de HELLP (hemólisis, niveles elevados de enzimas hepáticas, y recuentos bajos de plaquetas. La reducción del flujo sanguíneo en las



arterias uterinas medido mediante velocimetría Doppler es un indicador indirecto del desarrollo de insuficiencia placentaria, restricción del crecimiento intrauterino y/o preeclampsia.<sup>44,45</sup> Desde entonces, las directrices de la Liga Europea Contra el Reumatismo (EULAR) recomiendan el uso de la ultrasonografía Doppler de las arterias uterinas durante el monitoreo del embarazo.<sup>46</sup>

Las principales manifestaciones no trombóticas son la anemia hemolítica, trombocitopenia, *livedo reticularis* (un patrón de la piel de color azul rojizo a morado, uniforme, reversible, ininterrumpido, en forma de red), *livedo racemosa* (patrón asimétrico, fracturado, no uniforme, irreversible), vasculopatía livedoide (pápulas dolorosas y placas purpúricas eritemato-violáceas, que rápidamente evolucionan a vesículas hemorrágicas o a úlceras pequeñas dolorosas), enfermedad valvular cardíaca, hipertensión pulmonar, hemorragia alveolar difusa, nefropatía relacionada con el SAF (microangiopatía trombótica aguda o crónica), hemorragia suprarrenal, corea, epilepsia, pérdida de memoria y disfunción cognitiva (debido a vasculopatía asociada a aFL o a interacciones directas de los aFL con el parénquima cerebral después de la abrogación de la barrera hematoencefálica), migraña y mielopatía<sup>7</sup>.

El SAF catastrófico es una forma rara y potencialmente mortal del SAF que se presenta en menos del 1% de los pacientes y se caracteriza por la afectación simultánea o en menos de una semana de múltiples órganos, tejidos o sistemas. Por lo general le sigue a un factor precipitante, tal como una infección (en casi la mitad de los casos), suspensión de la anticoagulación, neoplasia, cirugía o embarazo. Según los criterios de clasificación, la confirmación histológica de oclusión de pequeños vasos es necesaria para establecer un diagnóstico.<sup>47</sup>

Algunas veces una alta sospecha clínica de SAF no está respaldada por positividad concomitante de los ensayos de aFL incluidos en los criterios serológicos para el SAF (AL e isotipos IgG e IgM de aCL y anticuerpos a $\beta$ 2GPI) que son persistentemente negativos. Este es el contexto del así llamado SAF seronegativo que ha sido descrito por Hughes y Khamashta en el 2003.<sup>48</sup> A partir de entonces, numerosos investigadores buscaron la presencia en estos pacientes de aFL no incluidos en los criterios serológicos para el SAF. Por ejemplo, estos anticuerpos no incluidos en los

criterios incluyen los aCL y aβ2GPI IgA, anticuerpos específicos para las proteínas plasmáticas de unión a fosfolípidos (cofactores), (tales como la fosfatidiletanolamina, protrombina, proteína C, proteína S, anexina V y dominio I de β2GPI), complejos de fosfolípido-proteína (en particular complejos vimentina–cardiolipina), y fosfolípidos aniónicos diferentes a la cardiolipina (incluyendo la fosfatidilserina, el fosfatidilinositol y el ácido fosfatídico).<sup>49–54</sup> En caso de alta sospecha de SAF con AL, aCL y aβ2GPI IgG e IgM, después de descartar otras causas de trombofilia, la búsqueda de estos anticuerpos no incluidos en los criterios puede sugerir el diagnóstico..

**Tratamiento**

El manejo de SAF ha sido objeto de controversia en los últimos años. La terapia anticoagulante es considerada la piedra angular del tratamiento, pero los agentes óptimos y la intensidad del tratamiento siguen siendo un tema de debate. Recientemente, la EULAR ha publicado guías actualizadas para el tratamiento del SAF.<sup>55</sup> Sin embargo, dado que el SAF es una enfermedad bastante nueva y rara, los datos de calidad para guiar el tratamiento son escasos y las decisiones de tratamiento se basan en la opinión de los expertos en varios casos. El tratamiento del SAF varía dependiendo de las manifestaciones clínicas, el perfil de aFL, y los factores de riesgo cardiovascular concurrentes. Las opciones de tratamiento en diferentes escenarios clínicos se presentan en las Tablas 2 y 3.

**Tabla 2**

| [0,1-2]Tratamiento del SAF trombótico según diferentes escenarios clínicos                                                                                                                             |                          |
|--------------------------------------------------------------------------------------------------------------------------------------------------------------------------------------------------------|--------------------------|
| <i>Trombopprofilaxis primaria</i>                                                                                                                                                                      | LDA (75–100‘ mg por día) |
| “ 1. Portadores asintomáticos de aFL (que no cumplen ningún criterio de clasificación para SAF vascular u obstétrico) con un perfil de aFL de alto riesgo, con o sin factores de riesgo tradicionales. |                          |
| “ 2. LES con aFL (especialmente aquellos con un perfil de aFL de alto riesgo) y sin antecedentes de trombosis                                                                                          |                          |
| “ 3. Antecedentes de SAF obstétrico fuera del embarazo                                                                                                                                                 |                          |
| [0,1-2]                                                                                                                                                                                                |                          |

[0,1-2] *Trombopprofilaxis secundaria*

- |                                                                                                                                                                                                                                                                                                                                     |                                                                                                                                                                                                                       |
|-------------------------------------------------------------------------------------------------------------------------------------------------------------------------------------------------------------------------------------------------------------------------------------------------------------------------------------|-----------------------------------------------------------------------------------------------------------------------------------------------------------------------------------------------------------------------|
| <p>“ 1. SAF definido y primera trombosis venosa</p> <p>“ “ a. No provocado: anticoagulación indefinida.</p> <p>“ “ b. Provocado: anticoagulación corta.</p> <p>“ 2. SAF definido y primera trombosis arterial</p> <p>“ 3. SAF definido y trombosis venosa recurrente a pesar del tratamiento con AVK con un INR objetivo de 2–3</p> | <p>[2,0] AVK con un INR objetivo de 2–3</p><br><p>AVK con un INR objetivo de 2–3 (3–4 en casos seleccionados)</p> <p>AVK con un INR objetivo de 3–4</p> <p>O</p> <p>HBPM)</p> <p>O</p> <p>AVK ‘ + ‘ LDA ‘ ± ‘ HCQ</p> |
|-------------------------------------------------------------------------------------------------------------------------------------------------------------------------------------------------------------------------------------------------------------------------------------------------------------------------------------|-----------------------------------------------------------------------------------------------------------------------------------------------------------------------------------------------------------------------|

[0,1-2]

*SAF catastrófico*

Glucocorticoides, UFH, Pex, IGIV, Rituximab, Eculizumab (refractario)

Abreviaturas: aFL, anticuerpos antifosfolipídicos; SAF, síndrome antifosfolipídico; LDA, aspirina en dosis bajas; LES, lupus eritematoso sistémico; AVK, antagonista de la vitamina K (p. ej. Warfarina); INR, cociente internacional normalizado; HBPM, heparina de bajo peso molecular (a dosis terapéuticas); HNF, heparina no fraccionada; Pex, recambio plasmático; IGIV, inmunoglobulina intravenosa.

**Perfil de alto riesgo:** presencia (en 2 o más ocasiones con al menos 12 semanas de diferencia) de anticoagulante lúpico (medido según las guías de la ISTH), o de doble (cualquier combinación de anticoagulante lúpico, o anticuerpos anticardiolipinas (aCL) o anticuerpos anti-β2-glicoproteína-I) o triple (los tres subtipos) positividad de aFL, o la presencia de títulos de aFL persistentemente altos.

**Perfil de bajo riesgo:** aCL aislados o anticuerpos anti-β2-glicoproteína-I en títulos bajos-medios, en particular si son transitoriamente positivos.

**Tabla 3**

| [0,1-2] Tratamiento del SAF obstétrico según diferentes escenarios clínicos                                                              |                                                                                                                                           |
|------------------------------------------------------------------------------------------------------------------------------------------|-------------------------------------------------------------------------------------------------------------------------------------------|
| <i>Portadoras asintomáticas de aFL</i>                                                                                                   | LDA<br>(75–100 <sup>+</sup> mg diarios)                                                                                                   |
| [0,1-2]                                                                                                                                  |                                                                                                                                           |
| [0,1-2] <i>SAF obstétrico</i>                                                                                                            |                                                                                                                                           |
| “ 1. Más de tres abortos espontáneos (antes de la décima semana de gestación) o al menos una pérdida fetal (después de la décima semana) | LDA <sup>+</sup> + <sup>+</sup> HBPM profiláctica)                                                                                        |
| “ 2. Parto antes de la semana 34 debido a preeclampsia, eclampsia, insuficiencia placentaria                                             | LDA <sup>+</sup> ± <sup>+</sup> HBPM profiláctica)                                                                                        |
| “ 3. Antecedentes de SAF trombótico                                                                                                      | LDA <sup>+</sup> + <sup>+</sup> HBPM terapéutica)                                                                                         |
| [0,1-2]                                                                                                                                  |                                                                                                                                           |
| <i>SAF obstétrico recurrente a pesar del tratamiento</i>                                                                                 | LDA <sup>+</sup> + <sup>+</sup> HBPM<br>terapéutica <sup>+</sup> ± <sup>+</sup> HCQ <sup>+</sup> ± <sup>+</sup> prednisona en dosis bajas |

Abreviaturas: aFL, anticuerpos antifosfolipídicos; SAF, síndrome antifosfolipídico; LDA, aspirina en dosis bajas; HBPM, heparina de bajo peso molecular; HCQ, hidroxicloroquina.

Se debe iniciar la LDA antes de la concepción. Se debe continuar la HBPM hasta 6 semanas después del parto.

No es infrecuente encontrar que un paciente es positivo para aFL durante una evaluación de una enfermedad autoinmune sistémica o por un tiempo de tromboplastina parcial activada (TTPa), o un resultado falso positivo de la prueba de sífilis. En tales casos se debe considerar que los aFL representan un factor de riesgo de trombosis y complicaciones del embarazo, que suelen ser multifactoriales. Por lo tanto, se debe tener en cuenta que una estratificación del riesgo basada en la edad, el perfil de aFL, los factores de riesgo de trombosis genéticos y adquiridos concomitantes (tales como dislipidemia, tabaquismo, hipertensión, diabetes, uso de anticonceptivos, menopausia, etc.) junto con la presencia de enfermedades

autoinmunes sistémicas, y es obligatorio hacer un seguimiento estricto. Un factor de riesgo importante es el perfil de aFL de alto riesgo, que incluye cualquiera de las siguientes condiciones: la presencia de AL como el subtipo de aFL más estrechamente relacionado con trombosis,<sup>56</sup> la presencia de doble (cualquier combinación de LAC, aCL y anticuerpos a $\beta$ 2GPI) o triple positividad de aFL, o la presencia de títulos persistentemente altos (por encima de 40 unidades de fosfolípidos IgG o IgM o un percentil >99). de aCL o a $\beta$ 2GPI.<sup>57</sup> Además, la trombosis se asocia más fuertemente con los anticuerpos del isotipo de IgG que con los del isotipo de IgM.<sup>58</sup> Un puntaje que tiene en cuenta los factores de riesgo cardiovascular (a saber, hipercolesterolemia e hipertensión) y el perfil de aFL, la Puntuación Global del Síndrome Antifosfolipídico (GAPSS, por sus siglas en inglés, *Global Anti-Phospholipid Syndrome Score*), ha demostrado que están relacionados con la probabilidad de presentar eventos trombóticos y obstétricos..<sup>59,60</sup>

El uso de aspirina en dosis bajas (LDA, por sus siglas en inglés) para la prevención primaria de la trombosis es controvertido ya que la calidad de la evidencia es baja.<sup>61</sup> El ensayo APLASA,<sup>62</sup> que estudió la trombopprofilaxis primaria con LDA en portadores asintomáticos de aFL, no demostró eficacia, pero tuvo poco poder para detectar diferencias entre el uso de LDA y placebo. Un metaanálisis de siete estudios observacionales de 460 portadores asintomáticos de aFL encontró que el riesgo de presentar la primera trombosis se redujo a la mitad en aquellos que utilizaron la LDA frente a aquellos que no la utilizaron.<sup>63</sup> Por lo tanto, las últimas recomendaciones de la EULAR sugieren tratar con LDA a las portadoras de aFL con un perfil de alto riesgo y/o un LES concomitante o las pacientes con SAF obstétrico fuera del embarazo.<sup>55</sup> Un perfil de aFL de riesgo moderado a alto justifica que se evite el uso de los anticonceptivos a base de estrógenos cuando sea posible y, si es factible, llevar a cabo una profilaxis postoperatoria agresiva con heparina de bajo peso molecular (HBPM).

En los pacientes con trombosis venosa asociada al SAF, después de una terapia inicial con heparina no fraccionada o HBPM, se recomienda una terapia anticoagulante a largo plazo con un antagonista de la vitamina K como la warfarina (coeficiente internacional normalizado [INR, por sus siglas en inglés, *international*

*normalized ratio*] objetivo 2–3). La anticoagulación de mayor intensidad, con un INR objetivo de 3–4, no redujo más el riesgo de trombosis recurrente, en dos ensayos clínicos aleatorizados.<sup>64,65</sup> La anticoagulación indefinida en pacientes con tromboembolismo venoso no provocado está altamente justificada, debido al alto riesgo de recurrencia de la trombosis en caso de que se suspenda el AVK..<sup>66</sup> No obstante, en caso de una primera trombosis venosa controlada (como después de una cirugía, inmovilidad prolongada, viajes a distancias grandes, etc.), el beneficio de la anticoagulación a largo plazo es menos claro, y de acuerdo con las directrices internacionales se debe suspender la terapia – especialmente en los casos con positividad transitoria y un perfil de aFL de bajo riesgo – como en los pacientes sin SAF.<sup>67</sup>

En caso de trombosis arterial, el tratamiento con un AVK con un INR objetivo de 2–3 no ha mostrado ninguna diferencia en la recurrencia de la trombosis comparado con un objetivo de 3–4 en dos ensayos clínicos.<sup>64,65</sup> Sin embargo, algunos centros prefieren el enfoque de un INR de mayor intensidad, debido al número reducido de pacientes con trombosis arterial incluidos en los estudios mencionados anteriormente. La asociación de AVK y LDA suele reservarse para los pacientes con factores de riesgo para enfermedad cardiovascular clínicamente significativos o pacientes en quienes un solo agente antitrombótico no ha logrado prevenir la recurrencia.<sup>57</sup> En la toma de decisiones, los médicos deben tener en cuenta el riesgo individual de trombosis recurrente y sangrado intenso, así como las preferencias del paciente después de la discusión.

En caso de recurrencia de la trombosis, falta evidencia de alta calidad para respaldar cualquier estrategia de manejo específica cuando fracasa la terapia con warfarina a pesar de un INR objetivo. Las opciones viables incluyen una terapia con heparina de mayor intensidad (INR objetivo, 3–4), cambio a HBPM, adición de LDA, antimaláricos,<sup>68</sup> estatinas, o una combinación de estas estrategias.<sup>55</sup>

Desde la introducción al mercado de los anticoagulantes orales directos (ACOD) en el 2010, estos recibieron una atención cada vez mayor debido a las ventajas obvias en términos de calidad de vida para los pacientes que tienen que seguir un tratamiento con AVK a largo plazo, a menudo de por vida, y tienen que acudir a la clínica cada 2–

3 semanas para obtener una determinación del INR. El estudio reciente TRAPS analizó la eficacia del rivaroxaban, un inhibidor directo del factor X, en comparación con la warfarina para la prevención de la recurrencia de trombosis en pacientes con triple positividad de aFL con trombosis arterial previa, mostrando un exceso de trombosis arterial en los pacientes tratados con rivaroxaban. Por lo tanto, los ACOD no se recomiendan en los pacientes con trombosis arterial.<sup>69</sup>

La prevención de complicaciones en el embarazo en pacientes asintomáticas con aFL, especialmente en aquellas con un perfil de alto riesgo, se basa en LDA (75–100 mg por día), aunque faltan evidencias sólidas.<sup>55</sup> Las mujeres embarazadas con SAF obstétrico previo deben ser tratadas con una combinación de LDA y una dosis profiláctica de heparina no fraccionada o HBPM),<sup>70</sup> con una tasa de nacidos vivos de alrededor del 75%,<sup>71</sup> aunque la calidad de la evidencia es baja.<sup>72</sup> Se debe iniciar la LDA preferiblemente antes de la concepción, y se debe agregar la heparina tan pronto como se haya confirmado el embarazo. Se prefiere la HBPM por razones prácticas. Se deben suspender los anticoagulantes orales en el momento de la concepción debido a su teratogenicidad entre las 6 y las 14 semanas de gestación. Se debe continuar la heparina hasta 6 semanas después del parto para prevenir la trombosis materna, dado el aumento del riesgo tromboembólico en el puerperio. En caso de morbilidad permanente en el embarazo a pesar de la terapia combinada, se debe considerar un incremento de la dosis de heparina hasta una dosis terapéutica, la adición de hidroxycloroquina<sup>73</sup> o prednisolona a dosis bajas<sup>74</sup> en el primer trimestre. Las inmunoglobulinas intravenosas son una opción en los casos refractarios,<sup>75</sup> aunque los resultados son contradictorios.<sup>76</sup> Aunque las estatinas no se utilizan habitualmente en el embarazo, un estudio de casos y controles que analizó el uso de pravastatina como estándar de atención en las pacientes con SAF con preeclampsia y/o restricción del crecimiento intrauterino no mostró progresión en comparación con LDA y HBPM.<sup>77</sup> El presunto mecanismo de acción se ha investigado en un estudio muy reciente y parece ser un aumento de la síntesis de óxido nítrico.<sup>78</sup> En las mujeres con antecedentes de SAF trombótico se recomienda un tratamiento combinado de LDA y heparina a dosis terapéuticas durante el embarazo, independientemente de su historia obstétrica.

Dado que el riesgo de trombosis a largo plazo para las mujeres con SAF obstétrico es menor que el riesgo para las mujeres cuyo evento definitorio del síndrome fue trombotico,<sup>79</sup> no se recomienda la terapia antitrombótica a largo plazo para las mujeres que tienen antecedentes de SAF obstétrico, pero no tienen ningún otro factor de riesgo para trombosis.

Un tratamiento inmediato y agresivo es crítico en el caso del SAF catastrófico, y el estándar de atención actual es la así denominada triple terapia, una combinación de anticoagulantes, glucocorticoides y recambio plasmático.<sup>80</sup> Las inmunoglobulinas intravenosas (1–2 g/kg, administradas durante un período de 2–5 días) a menudo se asocian con la triple terapia y, al igual que el rituximab, son una opción para los casos refractarios.<sup>81</sup> La inhibición del complemento (p. ej. el eculizumab) también puede ser una opción para los casos refractarios.<sup>81</sup> Dada la rareza del síndrome, se han hecho estudios no controlados, y las terapias propuestas se basan en evidencia de baja calidad.

Finalmente, las así llamadas manifestaciones no incluidas en los criterios representan un área gris de las guías de tratamiento. La trombocitopenia es exclusivamente de leve a moderada y no requiere tratamiento médico. En el caso raro de trombocitopenia severa (plaquetas por debajo de 20.000 por milímetro cúbico), el tratamiento se basa en glucocorticoides con o sin inmunoglobulinas intravenosas, según lo indicado.<sup>82</sup> La esplenectomía no es un tratamiento de primera línea debido al mayor riesgo de trombosis en los pacientes con SAF que se someten a cirugía.<sup>57</sup> Las terapias de segunda línea incluyen el micofenolato de mofetilo, la ciclofosfamida y la azatioprina con evidencia que proviene de series de casos y estudios observacionales.<sup>82</sup> El rituximab<sup>83</sup> y los agonistas del receptor de trombopoyetina <sup>84</sup> están indicados en los casos refractarios. El tratamiento de primera línea para la anemia hemolítica autoinmune en el SAF consiste en corticosteroides en dosis altas, mientras que los inmunosupresores tradicionales, el rituximab o la esplenectomía se han utilizado con éxito variable como tratamientos de segunda línea en los casos refractarios.<sup>85</sup>

Faltan recomendaciones basadas en la evidencia para el manejo de la enfermedad valvular cardíaca en el SAF. Un informe de consenso anterior concluyó que la anticoagulación oral no detiene el desarrollo o la progresión de las lesiones valvulares,



mientras que se puede considerar la LDA profiláctica en individuos asintomáticos positivos para aFL con enfermedad valvular.<sup>85</sup> Se recomienda la anticoagulación en pacientes con episodios tromboembólicos atribuidos a valvulopatía y se puede considerar en caso de vegetaciones debido al aumento del riesgo de accidente cerebrovascular tromboembólico.<sup>86</sup>

No existe consenso sobre el tratamiento de las manifestaciones neurológicas asociadas al SAF. Varios reportes de casos mostraron la eficacia del tratamiento antiplaquetario y anticoagulante, mientras que el papel de la inmunosupresión convencional no está claro.<sup>87</sup> Los reportes de casos demostraron éxito en el tratamiento de la corea asociada a aFL con hidroxiclороquina, micofenolato de mofetilo o inmunoglobulinas intravenosas, pero se requieren estudios prospectivos para examinar su eficacia.

La nefropatía asociada al SAF por lo general es lentamente progresiva, y se caracteriza histológicamente por hiperplasia fibrosa de la íntima, oclusión arterial fibrocelular, atrofia cortical focal y tiroidización tubular, y no tiene un tratamiento estándar. La anticoagulación está indicada en caso de antecedentes de SAF trombótico, pero se desconoce su papel en la evolución de la función renal, debido al número reducido de pacientes y al período de seguimiento limitado en la mayoría de las series de casos.<sup>85</sup> La insuficiencia renal aguda se asocia típicamente con microangiopatía trombótica y se puede tratar con rituximab,<sup>83</sup> eculizumab<sup>88</sup> y recambio plasmático.<sup>89</sup> En cualquier caso de nefropatía asociada a aFL, se recomienda altamente el control estricto de la hipertensión arterial y la proteinuria con inhibidores de la enzima convertidora de angiotensina y bloqueadores de los receptores de angiotensina.

Por lo general no se requieren tratamientos específicos para la *livedo reticularis* o la *livedo racemosa*. La vasculopatía livedoide suele ser refractaria a los glucocorticoides; se ha utilizado LDA, dipiridamol, clopidogrel, pentoxifilina, sildenafil, inmunoglobulinas intravenosas, activador del plasminógeno tisular, terapia con oxígeno hiperbárico, o una combinación de estas intervenciones, con o sin terapia anticoagulante.<sup>57,90</sup>

Algunas veces, los pacientes que inicialmente dieron positivo para aFL pueden volverse persistentemente negativos. En tales casos surge la pregunta de si es posible suspender el tratamiento anticoagulante. Coloma-Bazzan et al.<sup>91</sup> describieron una serie de 11 pacientes que no presentaron ningún episodio trombótico nuevo durante un seguimiento de 20 meses después de haber suspendido la anticoagulación, lo cual sugiere que la anticoagulación se puede suspender en forma segura en pacientes seleccionados. Sin embargo, la discontinuación del tratamiento con AVK en los pacientes que se volvieron persistentemente negativos para aFL requiere evidencia adicional.

### **Necesidades no satisfechas**

Todos los ensayos que se utilizan en forma rutinaria para detectar aFL muestran deficiencias metodológicas y falta de estandarización. La armonización de las condiciones de trabajo utilizando sistemas automatizados puede contribuir a una reducción de la variación interlaboratorio<sup>92</sup> y a la validación de varios ensayos con anticuerpos no incluidos en los criterios, tales como protrombina, complejo fosfatidilserina–protrombina, dominio 1, ácido fosfatídico, anexina A5, aCL y a $\beta$ 2GPI IgA.<sup>49</sup>

Como los criterios de clasificación actuales no incorporan el espectro completo de hallazgos clínicos para el SAF, está en marcha un esfuerzo internacional para desarrollar una clasificación más completa con el uso de los mismos métodos que se utilizaron para desarrollar los criterios de clasificación más recientes para el LES.<sup>93</sup>

Hay varias áreas de incertidumbre en el manejo del SAF en las que la evidencia es escasa o inexistente, tales como el tratamiento de las manifestaciones no incluidas en los criterios, del SAF seronegativo y de los casos refractarios de SAF trombótico y obstétrico.

El tratamiento del SAF obstétrico con el estándar de atención actual da lugar a tasas de nacidos vivos por encima del 70%, lo cual significa que alrededor del 30% de las mujeres siguen presentando complicaciones del embarazo. Está en curso un estudio multicéntrico aleatorizado controlado de la hidroxiclороquina (asociada al estándar de

atención) frente al placebo para mejorar el desenlace del embarazo en las mujeres con aFL (HYPATIA)<sup>94</sup> y se esperan los resultados.

Por último, y no menos importante, la posibilidad de suspender la anticoagulación en casos seleccionados de SAF trombótico en los que las pruebas para aFL se vuelven persistentemente negativas es otra zona gris en la cual la evidencia es escasa, y amerita más estudios.

### **Financiación**

Ninguna declarada.

### **Conflicto de intereses**

Ninguno declarado.

### **REFERENCIAS**

1. Wasserman A, Neisser A, Bruck C. Eine serodiagnostichereaktion bei syphilis. Dtsch Med Wochenschr. 1906;32:745.
2. Pangborn M. A new serologically active phospholipid from beef heart. Proc Soc Exp Biol Med. 1941;48:484–6.
3. Hughes GR, Thrombosis. abortion, cerebral disease, and the lupus anticoagulant. Br Med J (Clin Res Ed). 1983;287:1088–9.  
<http://dx.doi.org/10.1136/bmj.287.6399.1088>.
4. Alarcon Segovia D, Osmundson PJ. Peripheral vascular syndromes associated with Systemic Lupus Erythematosus. Ann Intern Med. 1965;62:907–19.  
<http://dx.doi.org/10.7326/0003-4819-62-5-907>.
5. Bowie EJ, Thompson JH Jr, Pascuzzi CA, Owen CA Jr. Thrombosis in systemic lupus erythematosus despite circulating anticoagulants. J Lab Clin Med. 1963;62:416–30.
6. Sanchez Medal L, Lisker R. Circulating anticoagulants in disseminated lupus erythematosus. Br J Haematol. 1959;5:284–93. <http://dx.doi.org/10.1111/j.1365-2141.1959.tb04036.x>.
7. Cervera R, Piette JC, Font J, Khamashta MA, Shoenfeld Y, Camps MT, et al. Antiphospholipid syndrome: clinical and immunologic manifestations and patterns of

disease expression in a cohort of 1,000 patients. *Arthritis Rheum.*2002;46:1019–27, <http://dx.doi.org/10.1002/art.10187>.

8. Asherson RA. The catastrophic antiphospholipid syndrome. *J Rheumatol.* 1992;19:508–12.

9. Duarte-Garcia A, Pham MM, Crowson CS, Amin S, Moder KG, Pruthi RK, et al. The epidemiology of antiphospholipid syndrome: a population-based study. *Arthritis Rheumatol.*2019;71:1545–52, <http://dx.doi.org/10.1002/art.40901>.

10. Hwang JJ, Shin SH, Kim YJ, Oh YM, Lee SD, Kim YH, et al. Epidemiology of antiphospholipid syndrome in Korea: a nationwide population-based study. *J Korean Med Sci.*2020;35, <http://dx.doi.org/10.3346/jkms.2020.35.e35>, e35.

11. Ginsburg KS, Liang MH, Newcomer L, Goldhaber SZ, Schur PH, Hennekens CH, et al. Anticardiolipin antibodies and the risk for ischemic stroke and venous thrombosis. *Ann Intern Med.*1992;117:997–1002. <http://dx.doi.org/10.7326/0003-4819-117-12-997>.

12. Andreoli L, Chighizola CB, Banzato A, Pons-Estel GJ, Ramire de Jesus G, Erkan D. Estimated frequency of antiphospholipid antibodies in patients with pregnancy morbidity, stroke, myocardial infarction, and deep vein thrombosis: a critical review of the literature. *Arthritis Care Res (Hoboken).*2013;65:1869–73. <http://dx.doi.org/10.1002/acr.22066>.

13. McClain MT, Arbuckle MR, Heinlen LD, Dennis GJ, Roebuck J, Rubertone MV, et al. The prevalence, onset, and clinical significance of antiphospholipid antibodies prior to diagnosis of systemic lupus erythematosus. *Arthritis Rheum.*2004;50:1226–32. <http://dx.doi.org/10.1002/art.20120>.

14. Petri M. Update on anti-phospholipid antibodies in SLE: the Hopkins' Lupus Cohort. *Lupus.* 2010;19:419–23. <http://dx.doi.org/10.1177/0961203309360541>.

15. Gomez-Puerta JA, Martin H, Amigo MC, Aguirre MA, Camps MT, Cuadrado MJ, et al. Long-term follow-up in 128 patients with primary antiphospholipid syndrome: do they develop lupus? *Medicine (Baltimore).* 2005;84:225–30. <http://dx.doi.org/10.1097/01.md.0000172074.53583.ea>.

16. Rodriguez-Pinto I, Moitinho M, Santacreu I, Shoenfeld Y, Erkan D, Espinosa G, et al. Catastrophic antiphospholipid syndrome (CAPS): descriptive analysis of 500 patients from the International CAPS Registry. *Autoimmun Rev.*2016;15:1120–4. <http://dx.doi.org/10.1016/j.autrev.2016.09.010>.

17. Galli M, Comfurius P, Maassen C, Hemker HC, de Baets MH, van Breda-Vriesman PJ, et al. Anticardiolipin antibodies (ACA) directed not to cardiolipin but to a plasma protein cofactor. *Lancet*. 1990;335:1544–7.  
[http://dx.doi.org/10.1016/0140-6736\(90\)91374-j](http://dx.doi.org/10.1016/0140-6736(90)91374-j).
18. Matsuura E, Igarashi Y, Fujimoto M, Ichikawa K, Koike T. Anticardiolipin cofactor(s) and differential diagnosis of autoimmune disease. *Lancet*. 1990;336:177–8.  
[http://dx.doi.org/10.1016/0140-6736\(90\)91697-9](http://dx.doi.org/10.1016/0140-6736(90)91697-9).
19. McNeil HP, Simpson RJ, Chesterman CN, Krilis SA. Anti-phospholipid antibodies are directed against a complex antigen that includes a lipid-binding inhibitor of coagulation: beta 2-glycoprotein I (apolipoprotein H). *Proc Natl Acad Sci USA*. 1990;87:4120–4. <http://dx.doi.org/10.1073/pnas.87.11.4120>.
20. Willems GM, Janssen MP, Pelsers MM, Comfurius P, Galli M, Zwaal RF, et al. Role of divalency in the high-affinity binding of anticardiolipin antibody-beta 2-glycoprotein I complexes to lipid membranes. *Biochemistry*. 1996;35:13833–42.  
<http://dx.doi.org/10.1021/bi960657q>.
21. de Laat HB, Derksen RH, Urbanus RT, Roest M, de Groot PG. Beta2-glycoprotein I-dependent lupus anticoagulant highly correlates with thrombosis in the antiphospholipid syndrome. *Blood*. 2004;104:3598–602.  
<http://dx.doi.org/10.1182/blood-2004-03-1107>.
22. Pierangeli SS, Colden-Stanfield M, Liu X, Barker JH, Anderson GL, Harris EN. Antiphospholipid antibodies from antiphospholipid syndrome patients activate endothelial cells in vitro and in vivo. *Circulation*. 1999;99:1997–2002.  
<http://dx.doi.org/10.1161/01.cir.99.15.1997>.
23. Sorice M, Longo A, Capozzi A, Garofalo T, Misasi R, Alessandri C, et al. Anti-beta2-glycoprotein I antibodies induce monocyte release of tumor necrosis factor alpha and tissue factor by signal transduction pathways involving lipid rafts. *Arthritis Rheum*. 2007;56:2687–97. <http://dx.doi.org/10.1002/art.22802>.
24. Bombeli T, Piccapietra B, Boersma J, Fehr J. Decreased anticoagulant response to tissue factor pathway inhibitor in patients with venous thromboembolism and otherwise no evidence of hereditary or acquired thrombophilia. *Thromb Haemost*. 2004;91:80–6. <http://dx.doi.org/10.1160/TH03-05-0329>.
25. Arachchillage DR, Efthymiou M, Mackie IJ, Lawrie AS, Machin SJ, Cohen H, et al. Anti-protein C antibodies are associated with resistance to endogenous protein C activation

and a severe thrombotic phenotype in antiphospholipid syndrome. *J Thromb Haemost*. 2014;12:1801–9. <http://dx.doi.org/10.1111/jth.12722>.

26. Breen KA, Seed P, Parmar K, Moore GW, Stuart-Smith SE, Hunt BJ. Complement activation in patients with isolated antiphospholipid antibodies or primary antiphospholipid syndrome. *Thromb Haemost*. 2012;107:423–9. <http://dx.doi.org/10.1160/TH11-08-0554>.

27. Zhang J, McCrae KR. Annexin A2 mediates endothelial cell activation by antiphospholipid/anti-beta2 glycoprotein I antibodies. *Blood*. 2005;105:1964–9. <http://dx.doi.org/10.1182/blood-2004-05-1708>.

28. Raschi E, Testoni C, Bosisio D, Borghi MO, Koike T, Mantovani A, et al. Role of the MyD88 transduction signaling pathway in endothelial activation by antiphospholipid antibodies. *Blood*. 2003;101:3495–500. <http://dx.doi.org/10.1182/blood-2002-08-2349>.

29. de Groot PG, Urbanus RT. The significance of autoantibodies against beta2-glycoprotein I. *Blood*. 2012;120:266–74. <http://dx.doi.org/10.1182/blood-2012-03-378646>.

30. Romay-Penabad Z, Aguilar-Valenzuela R, Urbanus RT, Derksen RH, Pennings MT, Papalardo E, et al. Apolipoprotein E receptor 2 is involved in the thrombotic complications in a murine model of the antiphospholipid syndrome. *Blood*. 2011;117:1408–14. <http://dx.doi.org/10.1182/blood-2010-07-299099>.

31. Canaud G, Bienaime F, Tabarin F, Bataillon G, Seilhean D, Noel LH, et al. Inhibition of the mTORC pathway in the antiphospholipid syndrome. *N Engl J Med*. 2014;371:303–12. <http://dx.doi.org/10.1056/NEJMoa1312890>.

32. Pierangeli SS, Leader B, Barilaro G, Willis R, Branch DW. Acquired and inherited thrombophilia disorders in pregnancy. *Obstet Gynecol Clin North Am*. 2011;38:271–95. <http://dx.doi.org/10.1016/j.ogc.2011.02.016>.

33. Chamley LW, Duncalf AM, Mitchell MD, Johnson PM. Action of anticardiolipin and antibodies to beta2-glycoprotein-I on trophoblast proliferation as a mechanism for fetal death. *Lancet*. 1998;352:1037–8. [http://dx.doi.org/10.1016/s0140-6736\(05\)60080-3](http://dx.doi.org/10.1016/s0140-6736(05)60080-3).

34. Girardi G, Berman J, Redecha P, Spruce L, Thurman JM, Kraus D, et al. Complement C5a receptors and neutrophils mediate fetal injury in the antiphospholipid syndrome. *J Clin Invest*. 2003;112:1644–54. <http://dx.doi.org/10.1172/JCI18817>.

35. Miyakis S, Lockshin MD, Atsumi T, Branch DW, Brey RL, Cervera R, et al. International consensus statement on an update of the classification criteria for

definite antiphospholipid syndrome (APS). *J Thromb Haemost.* 2006;4:295–306. <http://dx.doi.org/10.1111/j.1538-7836.2006.01753.x>.

36. Devreese KM, Pierangeli SS, de Laat B, Tripodi A, Atsumi T, Ortel TL, et al. Testing for antiphospholipid antibodies with solid phase assays: guidance from the SSC of the ISTH. *J Thromb Haemost.* 2014;12:792–5. <http://dx.doi.org/10.1111/jth.12537>.

37. Pengo V, Tripodi A, Reber G, Rand JH, Ortel TL, Galli M, et al. Update of the guidelines for lupus anticoagulant detection. Subcommittee on Lupus Anticoagulant/Antiphospholipid Antibody of the Scientific and Standardisation Committee of the International Society on Thrombosis and Haemostasis. *J Thromb Haemost.* 2009;7:1737–40. <http://dx.doi.org/10.1111/j.1538-7836.2009.03555.x>.

38. Favaloro EJ, Wheatland L, Jovanovich S, Roberts-Thomson P, Wong RC. Internal quality control and external quality assurance in testing for antiphospholipid antibodies: Part I – Anticardiolipin and anti-beta2-glycoprotein I antibodies. *Semin Thromb Hemost.* 2012;38:390–403. <http://dx.doi.org/10.1055/s-0032-1311990>.

39. Cervera R, Serrano R, Pons-Estel GJ, Cervera R, Shoenfeld Y, de Ramon E, et al. Morbidity and mortality in the antiphospholipid syndrome during a 10-year period: a multicentre prospective study of 1000 patients. *Ann Rheum Dis.* 2015;74:1011–8. <http://dx.doi.org/10.1136/annrheumdis-2013-204838>.

40. Cuadrado MJ, Mujic F, Munoz E, Khamashta MA, Hughes GR. Thrombocytopenia in the antiphospholipid syndrome. *Ann Rheum Dis.* 1997;56:194–6. <http://dx.doi.org/10.1136/ard.56.3.194>.

41. Tektonidou MG, Ioannidis JP, Boki KA, Vlachoyiannopoulos PG, Moutsopoulos HM. Prognostic factors and clustering of serious clinical outcomes in antiphospholipid syndrome. *QJM.* 2000;93:523–30. <http://dx.doi.org/10.1093/qjmed/93.8.523>.

42. Neville C, Rauch J, Kassis J, Solymoss S, Joseph L, Belisle P, et al. Antiphospholipid antibodies predict imminent vascular events independently from other risk factors in a prospective cohort. *Thromb Haemost.* 2009;101:100–7.

43. Alijotas-Reig J, Esteve-Valverde E, Ferrer-Oliveras R, Saez-Comet L, Lefkou E, Mekinian A, et al. The European Registry on Obstetric Antiphospholipid Syndrome (EUROAPS): a survey of 1000 consecutive cases. *Autoimmun Rev.* 2019;18:406–14. <http://dx.doi.org/10.1016/j.autrev.2018.12.006>.

44. Carbillon L, Uzan M, Uzan S. Pregnancy, vascular tone, and maternal hemodynamics: a crucial adaptation. *Obstet Gynecol Surv.* 2000;55:574–81. <http://dx.doi.org/10.1097/00006254-200009000-00023>.

45. Stone S, Hunt BJ, Khamashta MA, Bewley SJ, Nelson-Piercy C. Primary antiphospholipid syndrome in pregnancy: an analysis of outcome in a cohort of 33 women treated with a rigorous protocol. *J Thromb Haemost*. 2005;3:243–5. <http://dx.doi.org/10.1111/j.1538-7836.2005.01185.x>.
46. Andreoli L, Bertias GK, Agmon-Levin N, Brown S, Cervera R, Costedoat-Chalumeau N, et al. EULAR recommendations for women's health and the management of family planning, assisted reproduction, pregnancy and menopause in patients with systemic lupus erythematosus and/or antiphospholipid syndrome. *Ann Rheum Dis*. 2017;76:476–85. <http://dx.doi.org/10.1136/annrheumdis-2016-209770>.
47. Asherson RA, Cervera R, de Groot PG, Erkan D, Boffa MC, Piette JC, et al. Catastrophic antiphospholipid syndrome: international consensus statement on classification criteria and treatment guidelines. *Lupus*. 2003;12:530–4. <http://dx.doi.org/10.1191/0961203303lu394oa>.
48. Hughes GR, Khamashta MA. Seronegative antiphospholipid syndrome. *Ann Rheum Dis*. 2003;62:1127. <http://dx.doi.org/10.1136/ard.2003.006163>.
49. Bertolaccini ML, Amengual O, Atsumi T, Binder WL, de Laat B, Forastiero R, et al. 'Non-criteria' aPL tests: report of a taskforce and preconference workshop at the 13th International Congress on Antiphospholipid Antibodies, Galveston, TX, USA. April 2010. *Lupus*. 2011;20:191–205. <http://dx.doi.org/10.1177/0961203310397082>.
50. Conti F, Alessandri C, Sorice M, Capozzi A, Longo A, Garofalo T, et al. Thin-layer chromatography immunostaining in detecting anti-phospholipid antibodies in seronegative anti-phospholipid syndrome. *Clin Exp Immunol*. 2012;167:429–37. <http://dx.doi.org/10.1111/j.1365-2249.2011.04532.x>.
51. Conti F, Capozzi A, Truglia S, Lococo E, Longo A, Misasi R, et al. The mosaic of "seronegative" antiphospholipid syndrome. *J Immunol Res*. 2014;2014. <http://dx.doi.org/10.1155/2014/389601>.
52. Cousins L, Pericleous C, Khamashta M, Bertolaccini ML, Ioannou Y, Giles I, et al. Antibodies to domain I of beta-2-glycoprotein I and IgA antiphospholipid antibodies in patients with 'seronegative' antiphospholipid syndrome. *Ann Rheum Dis*. 2015;74:317–9. <http://dx.doi.org/10.1136/annrheumdis-2014-206483>.
53. Mattia E, Ruffatti A, Tonello M, Meneghel L, Robecchi B, Pittoni M, et al. IgA anticardiolipin and IgA anti-beta2glycoprotein I antibody positivity determined by fluorescence xxxenzyme immunoassay in primary antiphospholipid syndrome. *Clin Chem Lab Med*. 2014;52:1329–33. <http://dx.doi.org/10.1515/cclm-2014-0039>.



54. Ortona E, Capozzi A, Colasanti T, Conti F, Alessandri C, Longo A, et al. Vimentin/cardiolipin complex as a new antigenic target of the antiphospholipid syndrome. *Blood*. 2010;116:2960–7. <http://dx.doi.org/10.1182/blood-2010-04-279208>.
55. Tektonidou MG, Andreoli L, Limper M, Amoura Z, Cervera R, Costedoat-Chalumeau N, et al. EULAR recommendations for the management of antiphospholipid syndrome in adults. *Ann Rheum Dis*. 2019;78:1296–304. <http://dx.doi.org/10.1136/annrheumdis-2019-215213>.
56. Devreese KM. Antiphospholipid antibodies: evaluation of the thrombotic risk. *Thromb Res*. 2012;130 Suppl. 1:S37–40. <http://dx.doi.org/10.1016/j.thromres.2012.08.270>.
57. Garcia D, Erkan D. Diagnosis and management of the antiphospholipid syndrome. *N Engl J Med*. 2018;378:2010–21. <http://dx.doi.org/10.1056/NEJMra1705454>.
58. Kelchtermans H, Pelkmans L, de Laat B, Devreese KM. IgG/IgM antiphospholipid antibodies present in the classification criteria for the antiphospholipid syndrome: a critical review of their association with thrombosis. *J Thromb Haemost*. 2016;14:1530–48. <http://dx.doi.org/10.1111/jth.13379>.
59. Sciascia S, Sanna G, Murru V, Roccatello D, Khamashta MA, Bertolaccini ML. GAPSS: the Global Anti-Phospholipid Syndrome Score. *Rheumatology (Oxford)*. 2013;52:1397–403. <http://dx.doi.org/10.1093/rheumatology/kes388>.
60. Radin M, Cecchi I, Schreiber K, Rubini E, Roccatello D, Cuadrado MJ, et al. Pregnancy success rate and response to heparins and/or aspirin differ in women with antiphospholipid antibodies according to their Global Antiphospholipid Syndrome Score. *Semin Arthritis Rheum*. 2020;50:553–6. <http://dx.doi.org/10.1016/j.semarthrit.2020.01.007>.
61. Arnaud L, Mathian A, Devilliers H, Ruffatti A, Tektonidou M, Forastiero R, et al. Patient-level analysis of five international cohorts further confirms the efficacy of aspirin for the primary prevention of thrombosis in patients with antiphospholipid antibodies. *Autoimmun Rev*. 2015;14:192–200. <http://dx.doi.org/10.1016/j.autrev.2014.10.019>.
62. Erkan D, Harrison MJ, Levy R, Peterson M, Petri M, Sammaritano L, et al. Aspirin for primary thrombosis prevention in the antiphospholipid syndrome: a randomized, double-blind, placebo-controlled trial in asymptomatic antiphospholipid antibody-positive individuals. *Arthritis Rheum*. 2007;56:2382–91. <http://dx.doi.org/10.1002/art.22663>.

63. Arnaud L, Mathian A, Ruffatti A, Erkan D, Tektonidou M, Cervera R, et al. Efficacy of aspirin for the primary prevention of thrombosis in patients with antiphospholipid antibodies: an international and collaborative meta-analysis. *Autoimmun Rev.* 2014;13:281–91. <http://dx.doi.org/10.1016/j.autrev.2013.10.014>.
64. Crowther MA, Ginsberg JS, Julian J, Denburg J, Hirsh J, Douketis J, et al. A comparison of two intensities of warfarin for the prevention of recurrent thrombosis in patients with the antiphospholipid antibody syndrome. *N Engl J Med.* 2003;349:1133–8, <http://dx.doi.org/10.1056/NEJMoa035241>.
65. Finazzi G, Marchioli R, Brancaccio V, Schinco P, Wisloff F, Musial J, et al. A randomized clinical trial of high-intensity warfarin vs. conventional antithrombotic therapy for the prevention of recurrent thrombosis in patients with the antiphospholipid syndrome (WAPS). *J Thromb Haemost.* 2005;3:848–53. <http://dx.doi.org/10.1111/j.1538-7836.2005.01340.x>.
66. Garcia D, Akl EA, Carr R, Kearon C. Antiphospholipid antibodies and the risk of recurrence after a first episode of venous thromboembolism: a systematic review. *Blood.* 2013;122:817–24. <http://dx.doi.org/10.1182/blood-2013-04-496257>.
67. Kearon C, Akl EA, Ornelas J, Blaivas A, Jimenez D, Bounameaux H, et al. Antithrombotic therapy for VTE disease: CHEST guideline and expert panel report. *Chest.* 2016;149:315–52, <http://dx.doi.org/10.1016/j.chest.2015.11.026>.
68. Schmidt-Tanguy A, Voswinkel J, Henrion D, Subra JF, Loufrani L, Rohmer V, et al. Antithrombotic effects of hydroxychloroquine in primary antiphospholipid syndrome patients. *J Thromb Haemost.* 2013;11:1927–9. <http://dx.doi.org/10.1111/jth.12363>.
69. Pengo V, Banzato A, Bison E, Zoppellaro G, Padayattil Jose S, Denas G. Efficacy and safety of rivaroxaban vs warfarin in high-risk patients with antiphospholipid syndrome: rationale and design of the trial on rivaroxaban in antiphospholipid syndrome (TRAPS) trial. *Lupus.* 2016;25:301–6. <http://dx.doi.org/10.1177/0961203315611495>.
70. Bates SM, Greer IA, Middeldorp S, Veenstra DL, Prabulos AM, Vandvik PO. VTE, thrombophilia, antithrombotic therapy, and pregnancy: antithrombotic therapy and prevention of thrombosis, 9th ed: American College of Chest Physicians Evidence-Based Clinical Practice Guidelines. *Chest.* 2012;141 2Suppl:e691S–736S, <http://dx.doi.org/10.1378/chest.11-2300>.
71. Mak A, Cheung MW, Cheak AA, Ho RC. Combination of heparin and aspirin is superior to aspirin alone in enhancing live births in patients with recurrent pregnancy

loss and positive anti-phospholipid antibodies: a meta-analysis of randomized controlled trials and meta-regression. *Rheumatology (Oxford)*. 2010;49:281–8. <http://dx.doi.org/10.1093/rheumatology/kep373>.

72. Empson M, Lassere M, Craig J, Scott J. Prevention of recurrent miscarriage for women with antiphospholipid antibody or lupus anticoagulant. *Cochrane Database Syst Rev*. 2005. <http://dx.doi.org/10.1002/14651858.CD002859.pub2>.

73. Mekinian A, Lazzaroni MG, Kuzenko A, Alijotas-Reig J, Ruffatti A, Levy P, et al. The efficacy of hydroxychloroquine for obstetrical outcome in anti-phospholipid syndrome: data from a European multicenter retrospective study. *Autoimmun Rev*. 2015;14:498–502. <http://dx.doi.org/10.1016/j.autrev.2015.01.012>.

74. Bramham K, Thomas M, Nelson-Piercy C, Khamashta M, Hunt BJ. First-trimester low-dose prednisolone in refractory antiphospholipid antibody-related pregnancy loss. *Blood*. 2011;117:6948–51. <http://dx.doi.org/10.1182/blood-2011-02-339234>.

75. Tincani A, Scarsi M, Franceschini F, Cattaneo R. Intravenous immunoglobulin in pregnancy: a chance for patients with an autoimmune disease. *Isr Med Assoc J*. 2007;9:553–4.

76. Branch DW, Peaceman AM, Druzin M, Silver RK, El-Sayed Y, Silver RM, et al. A multicenter, placebo-controlled pilot study of intravenous immune globulin treatment of antiphospholipid syndrome during pregnancy. *Am J Obstet Gynecol*. 2000;182 Pt 1:122–7. [http://dx.doi.org/10.1016/s0002-9378\(00\)70500-x](http://dx.doi.org/10.1016/s0002-9378(00)70500-x).

77. Lefkou E, Mamopoulos A, Dagklis T, Vosnakis C, Rousso D, Girardi G. Pravastatin improves pregnancy outcomes in obstetric antiphospholipid syndrome refractory to antithrombotic therapy. *J Clin Invest*. 2016;126:2933–40. <http://dx.doi.org/10.1172/JCI86957>.

78. Lefkou E, Varoudi K, Pombo J, Jurisic A, Jurisic Z, Contento G, et al. Triple therapy with pravastatin, low molecular weight heparin and low dose aspirin improves placental haemodynamics and pregnancy outcomes in obstetric antiphospholipid syndrome in mice and women through a nitric oxide-dependent mechanism. *Biochem Pharmacol*. 2020;182:114217. <http://dx.doi.org/10.1016/j.bcp.2020.114217>
